# Supplementary material for: Characterization of migraineurs presenting interictal widespread pressure hyperalgesia identified using a tender point count: a cross-sectional study
Source: J Headache Pain. 2017 Dec 28;18(1):117. doi: 10.1186/s10194-017-0824-0 (PMC5745372; doi:10.1186/s10194-017-0824-0)
Supplement: Additional file 1 — Original data. (XLSX 247 kb) [file 10194_2017_824_MOESM1_ESM.xlsx]

## Sheet: Figure2 オリジナル
Percentage of migraine patients and control subjects with "moderate " or "severe or greater" tenderness at the 18 tender point sites examined.
Values are means of paired (left and right) tender point sites.
Open bars show controls and left side bars show migraineurs; gray bars show left side.
lower: lower part of body, upper; upper part of of body,
			right	mean	left					EM	Controls		mean
	lower	99.2	0.8	0.8	0.8	99.2			89.9621	10.0379	0.735294	99.2647
		89.9621	10.0379	9.75379	9.4697	90.5303		lower	90.5303	9.4697	0.735294	99.2647	0.735294
	upper	87.7451	12.2549	12.7451	13.2353	86.7647			53.4091	46.5909	12.2549	87.7451
		53.4091	46.5909	47.2064	47.822	52.178		upper	52.178	47.822	13.2353	86.7647	12.7451
	Knee	99.2	0.8	0.4	0	100			92.0455	7.95455	0.8	99.2
		92.0455	7.95455	9.94318	11.9318	88.0682		Knee	88.0682	11.9318	0	100	0.4
	Gluteal	100	0	0.4	0.8	99.2			90.3409	9.65909	0	100
		90.3409	9.65909	10.5114	11.3636	88.6364		Gluteal	88.6364	11.3636	0.8	99.2	0.4
	Supraspinatus	99.2	0.8	0.778788	0.757576	99.2424			84.0909	15.9091	0.757576	99.2424
		84.0909	15.9091	16.1932	16.4773	83.5227		Supraspinatus	83.5227	16.4773	0.757576	99.2424	0.757576
	Greater Trochanter	98.4848	1.51515	1.51515	1.51515	98.4848			91.4773	8.52273	1.51515	98.4848
		91.4773	8.52273	8.80682	9.09091	90.9091		Greater Trochanter	90.9091	9.09091	1.51515	98.4848	1.51515
	Occiput	91.7	8.3	8.7	9.1	90.9			73.8636	26.1364	8.3	91.7
		73.8636	26.1364	27.8409	29.5455	70.4545		Occiput	70.4545	29.5455	9.1	90.9	8.7
	Lateral Epicondyle	91.6667	8.33333	10.2273	12.1212	87.8788			48.8636	51.1364	8.33333	91.6667
		48.8636	51.1364	52.2727	53.4091	46.5909		Lateral Epicondyle	46.5909	53.4091	12.1212	87.8788	10.2273
	Trapezius	84.8	15.2	15.55	15.9	84.1			59.0909	40.9091	15.2	84.8
		59.0909	40.9091	42.0455	43.1818	56.8182		Trapezius	56.8182	43.1818	15.9	84.1	15.55
	Low Cervical	81.0606	18.9394	18.9394	18.9394	81.0606			27.2727	72.7273	18.9394	81.0606
		27.2727	72.7273	72.7273	72.7273	27.2727		Low Cervical	27.2727	72.7273	18.9394	81.0606	18.9394
	Second Rib	75.7576	24.2424	24.6212	25	75			27.2727	72.7273	24.2424	75.7576
		27.2727	72.7273	72.1591	71.5909	28.4091		Second Rib	28.4091	71.5909	25	75	24.6212

## Sheet: 176例TP数
second ID	gender	current age	Date	SDS	MIDAS	HIT-6	Aura	duration of disease	age at onset	freaquency/year	intensity of headache	duration of attack	Nausea	photophobia	phonophobia	osmophobia	ASC12	allodynia present	Rt. Second Rib oisitive TP	Lt. Second Rib oisitive TP	Rt. Low Cervical positeve TP	Lt. Low Cervical positeve TP	Rt. Lateral Epicondyle positeve TP	Lt. Lateral Epicondyle positeve TP	LT. Occiput positeve TP	RT. Occiput positeve TP	Lt. Trapezius positeve TP	Rt. Trapezius positeve TP	Lt. Supraspinatus positeve TP	Rt. Supraspinatus positeve TP	Lt. Gluteal positive TP	Rt. Gluteal positive TP	Lt. Greater Trochanter positive TP	Rt. Greater Trochanter positive TP	Rt. Knee positive TP	Lt. Knee positive TP	TPC	WPH pisitive
22	2	43	2015-03-02	37	12	63	1	28	15	48	8	24	1	1	1	1	6	1	1	1	1	1	1	1	1	1	1	1	1	1	1	0	1	1	1	1	17	1
131	2	31	2015-03-05	46	2	62	1	15	16	30	6	3	1	0	0	0	2	1	1	1	1	1	0	0	1	1	1	1	0	0	1	1	1	1	0	0	12	1
143	2	19	2015-03-05	55	6	65	1	4	15	30	10	24	1	1	1	0	3	1	0	0	0	0	0	0	0	0	1	1	0	0	0	0	0	0	0	0	2	0
78	1	31	2015-03-06	34	7	61	1	16	15	120	8	72	1	1	1	0	5	1	1	1	1	1	0	0	0	0	0	0	0	0	0	0	0	0	0	0	4	0
65	2	45	2015-03-09	33	4	63	0	30	15	30	8	48	1	1	1	1	2	1	1	1	1	1	0	0	0	0	0	0	0	0	0	0	0	0	0	0	4	0
144	2	52	2015-03-09	47	8	62	0	30	22	18	10	12	1	1	1	0	4	1	1	1	1	1	0	0	1	1	1	1	0	0	0	0	1	0	0	0	9	1
102	2	33	2015-03-09	32	0	52	0	11	22	48	6	24	1	1	1	1	1	0	0	0	0	0	0	0	0	0	0	0	0	0	0	0	0	0	0	0	0	0
108	2	36	2015-03-10	31	0	60	0	19	17	18	8	48	1	1	1	1	4	1	0	0	0	0	0	0	0	0	0	0	0	0	0	0	0	0	0	0	0	0
116	2	44	2015-03-11	49	4	56	0	35	9	3.6	10	12	1	1	1	1	7	1	0	0	1	1	0	0	0	0	0	0	0	0	0	0	0	0	0	0	2	0
88	2	20	2015-03-12	50	10	63	0	4	16	48	9	60	1	1	0	0	2	1	1	1	1	1	0	0	1	1	0	0	0	0	0	0	0	0	0	0	6	0
6	2	40	2015-03-13	40	4	58	1	4	36	36	8	48	1	1	1	0	4	1	1	1	1	1	0	0	0	0	0	0	0	0	0	0	0	0	0	0	4	0
139	1	53	2015-03-13	50	2	64	1	5	48	144	7	6	1	1	1	1	1	0	1	1	1	1	1	1	0	0	1	1	0	0	0	0	0	0	1	0	9	1
33	2	38	2015-03-13	38	0	52	1	20	18	96	9	24	1	1	1	1	0	0	0	0	0	0	0	0	0	0	0	0	0	0	0	0	0	0	0	0	0	0
103	2	47	2015-03-16	36	3	54	1	7	40	120	7	48	1	1	1	1	3	1	1	1	1	1	1	1	0	0	0	0	0	0	1	1	1	1	1	1	12	1
141	1	37	2015-03-20	35	1	50	1	22	15	18	7	24	1	1	0	0	3	1	0	0	0	0	0	0	0	0	0	0	0	0	0	0	0	0	0	0	0	0
142	2	37	2015-03-24	34	6	51	0	3	34	6	8	24	0	1	1	0	0	0	0	0	1	1	0	0	0	0	0	0	0	0	0	0	0	0	0	0	2	0
91	2	42	2015-04-02	40	26	65	1	17	25	120	9	72	1	1	1	1	2	1	1	1	1	1	1	1	1	1	1	1	0	0	1	1	0	0	0	0	12	1
145	2	36	2015-04-07	40	20	70	0	20	16	12	6	24	1	0	1	0	2	1	1	1	1	1	0	0	0	0	0	0	0	0	0	0	0	0	0	0	4	0
146	2	48	2015-04-07	40	18	60	0	18	30	12	5	72	1	0	1	1	1	0	0	0	0	0	0	0	0	0	0	0	0	0	0	0	0	0	0	0	0	0
73	2	49	2015-04-08	42	6	60	0	19	30	48	7	24	1	1	1	1	4	1	1	1	1	1	1	1	0	0	0	0	0	0	0	0	0	0	0	0	6	0
98	1	31	2015-04-08	52	10	66	0	15	16	96	7	24	1	1	1	0	3	1	1	1	1	1	1	1	0	0	0	0	0	0	0	0	0	0	0	0	6	0
44	1	34	2015-04-08	51	1	60	0	0.33	33.67	48	7	6	1	0	0	0	0	0	1	1	0	0	0	0	0	0	0	0	0	0	0	0	0	0	0	0	2	0
147	2	20	2015-04-13	37	1	56	0	6	14	12	7	12	1	0	0	0	0	0	1	1	1	1	0	0	1	1	1	1	0	0	0	0	0	0	0	0	8	1
38	2	27	2015-04-13	41	13	63	1	11	16	120	8	24	1	1	1	1	2	1	1	0	1	0	0	0	0	0	0	0	0	0	0	0	0	0	0	0	2	0
18	2	23	2015-04-20	49	16	64	1	13	10	96	8	24	1	1	1	0	8	1	1	1	1	1	1	1	1	1	1	1	0	0	0	0	1	1	1	0	13	1
63	2	27	2015-04-24	44	4	65	1	10	17	24	8	48	1	0	0	0	7	1	1	1	1	1	0	0	0	0	1	1	0	0	0	0	0	0	0	0	6	0
60	2	30	2015-04-27	56	12	71	1	21	9	24	8	24	1	1	1	1	3	1	1	1	1	1	1	1	0	0	0	0	0	0	0	0	0	0	0	0	6	0
148	2	46	2015-05-07	41	2	54	1	37	9	30	6	4	0	1	1	0	2	1	1	1	1	1	0	0	0	0	1	1	1	1	1	1	0	0	0	0	10	1
149	2	46	2015-05-07	27	2	64	0	36	10	42	7	24	0	1	1	1	2	1	1	1	1	1	0	0	0	0	0	0	0	0	0	0	0	0	0	0	4	0
190	2	41	2015-05-11	31	2	57	0	20	21	12	8	24	1	1	1	0	0	0	1	1	1	1	0	0	1	1	0	0	0	0	0	0	0	0	0	0	6	0
129	2	24	2015-05-11	37	6	67	0	3	21	18	8	60	1	1	0	0	0	0	1	1	0	0	1	1	0	0	0	0	0	0	0	0	1	1	0	0	6	0
27	2	41	2015-05-13	31	5	65	1	2	39	12	6	6	1	1	1	1	4	1	1	1	1	1	0	0	0	0	0	0	0	0	0	0	0	1	1	0	6	0
150	2	36	2015-05-13	39	2	55	0	3	33	6	8	12	1	0	1	0	2	1	0	0	1	1	0	0	0	0	0	0	0	0	0	0	0	0	0	0	2	0
151	2	44	2015-05-15	42	6	64	0	26	18	24	6	4	0	1	1	0	4	1	1	1	1	1	1	1	0	0	0	0	0	0	0	0	1	1	0	0	8	1
152	1	50	2015-05-19	33	2	54	0	10	40	6	10	12	1	1	1	1	0	0	1	1	1	1	0	0	0	0	0	0	0	0	0	0	0	0	0	0	4	0
82	2	36	2015-05-20	39	7	61	0	18	18	12	9	72	1	1	1	1	5	1	0	0	0	0	0	0	0	0	0	0	0	0	0	0	0	0	0	0	0	0
153	1	48	2015-05-21	57	15	72	0	20	28	12	8	24	1	1	0	1	0	0	1	1	1	1	1	1	0	0	0	0	0	0	0	0	0	0	0	0	6	0
17	2	51	2015-05-27	28	6	60	1	21	30	24	8	24	1	1	1	1	3	1	1	1	1	1	0	0	0	0	0	0	0	0	0	0	0	0	0	0	4	0
8	2	44	2015-05-29	45	8	66	1	10	34	12	8	24	1	1	1	0	5	1	1	1	0	0	0	0	0	0	0	0	0	0	0	0	0	0	0	0	2	0
51	2	46	2015-05-30	49	2	62	0	10	36	12	6	24	1	1	1	1	2	1	1	1	1	1	0	0	0	0	0	0	0	0	0	0	0	0	0	0	4	0
126	1	37	2015-06-03	41	5	63	0	2	35	120	8	24	1	1	1	0	4	1	1	1	1	1	1	1	1	1	1	1	0	0	0	0	0	0	0	0	10	1
109	2	38	2015-06-04	32	4	61	0	23	15	36	8	24	0	0	0	0	0	0	0	0	1	1	1	1	0	0	0	0	0	0	0	0	0	0	0	0	4	0
62	2	28	2015-06-05	30	2	60	0	15	13	24	8	24	1	0	0	0	0	0	1	1	0	0	0	0	0	0	0	0	0	0	0	0	0	0	0	0	2	0
154	1	35	2015-06-08	33	0	55	1	5	30	1.2	8	6	1	1	1	0	1	0	0	0	1	1	0	1	0	0	0	0	0	0	0	0	0	0	0	0	3	0
80	2	58	2015-06-09	28	0	52	0	36	22	2.4	4	24	1	1	1	0	3	1	0	0	0	1	0	0	0	0	0	0	0	0	0	0	0	0	0	0	1	0
64	2	34	2015-06-11	56	12	54	1	14	20	18	5	12	1	1	1	1	2	1	1	1	1	1	0	0	0	0	1	1	0	0	0	0	0	0	0	0	6	0
155	1	23	2015-06-11	30	0	54	0	8	15	6	6	24	1	0	0	0	0	0	0	0	0	0	0	0	0	0	0	0	0	0	0	0	0	0	0	0	0	0
76	2	49	2015-06-12	46	6	58	0	29	20	30	8	24	1	1	1	1	3	1	1	1	1	1	1	1	0	0	0	0	0	0	0	0	0	0	0	0	6	0
74	1	40	2015-06-12	31	6	60	0	12	28	18	6	6	1	1	0	0	4	1	0	0	1	1	1	1	0	0	0	0	0	0	0	0	0	0	0	0	4	0
49	2	44	2015-06-12	32	1	60	0	26	18	6	6	24	1	1	0	1	2	1	0	0	0	0	0	0	0	0	0	0	0	0	0	0	0	0	0	0	0	0
121	1	33	2015-06-15	27	4	59	0	6	27	18	8	24	1	1	0	0	0	0	0	0	0	0	0	0	0	0	0	0	0	0	0	0	0	0	0	0	0	0
125	2	41	2015-06-16	53	0	47	1	20	21	48	5	24	1	1	1	0	0	0	1	1	1	1	1	1	0	0	0	0	1	1	0	0	1	1	1	0	11	1
104	2	19	2015-06-22	53	8	66	1	5	14	24	8	12	1	1	1	0	3	1	1	1	1	1	0	0	1	1	1	1	1	1	1	1	0	0	0	0	12	1
32	2	34	2015-06-24	43	10	62	0	15	19	48	7	48	1	1	1	1	5	1	1	1	1	1	1	1	0	0	1	1	0	0	0	0	1	1	0	0	10	1
2	2	52	2015-06-26	52	0	50	1	20	32	3	6	6	1	1	1	1	0	0	0	0	0	1	0	0	0	0	0	0	0	0	0	0	0	0	0	0	1	0
105	2	32	2015-06-29	48	11	65	0	15	17	60	8	6	1	1	1	1	4	1	1	1	1	1	1	1	0	0	0	0	0	0	0	0	1	1	0	0	8	1
58	2	38	2015-07-01	46	12	61	0	18	20	120	8	36	1	1	1	1	4	1	1	1	1	1	1	1	0	0	0	0	0	0	0	0	1	0	0	0	7	1
20	2	46	2015-07-06	41	0	67	0	25	21	6	10	6	1	1	1	1	1	0	1	1	1	1	0	0	0	0	0	0	0	0	0	0	0	0	0	0	4	0
83	2	27	2015-07-10	46	1	58	0	2	25	6	8	6	1	0	1	0	0	0	1	1	1	1	1	1	0	0	1	1	0	0	0	0	0	0	0	0	8	1
68	2	28	2015-07-13	45	4	58	0	15	13	48	8	6	1	1	1	1	2	1	1	1	1	1	1	1	1	1	1	1	0	0	0	0	0	0	0	0	10	1
84	2	38	2015-07-13	39	1	52	1	18	20	12	6	12	1	1	1	0	5	1	1	1	1	1	0	0	0	0	0	0	0	0	0	0	0	0	0	0	4	0
157	2	25	2015-07-13	47	13	66	0	15	10	30	8	6	1	1	1	1	7	1	0	0	0	0	0	1	0	0	0	0	0	0	0	0	0	0	0	0	1	0
34	2	41	2015-07-15	42	2	65	0	18	23	54	8	24	1	1	1	1	0	0	1	1	1	1	1	1	1	1	1	1	1	1	1	1	1	1	0	0	16	1
119	2	43	2015-07-18	46	2	58	0	18	25	18	8	12	0	1	1	1	2	1	1	1	1	1	1	1	1	0	1	0	0	0	0	0	0	0	0	0	8	1
11	2	60	2015-07-21	36	8	64	0	39	21	24	7	12	1	1	0	0	0	0	1	1	1	1	1	1	0	0	0	0	0	0	0	0	0	0	0	0	6	0
158	2	46	2015-07-21	33	1	54	0	6	40	3.96	8	6	1	0	0	0	0	0	1	1	1	1	0	0	0	0	1	1	0	0	0	0	0	0	0	0	6	0
101	2	28	2015-07-22	44	13	61	1	13	15	120	8	48	1	1	1	1	7	1	1	1	1	1	1	1	1	1	1	1	0	0	0	0	0	0	0	0	10	1
114	2	24	2015-07-22	51	8	74	1	16	8	8.4	8	24	1	1	1	1	4	1	1	1	1	1	1	1	0	0	1	1	0	0	0	0	0	0	0	0	8	1
12	2	38	2015-07-22	42	0	52	0	27	11	30	8	24	0	1	1	1	3	1	1	1	0	0	1	1	0	0	0	0	0	0	0	0	0	0	0	0	4	0
156	2	48	2015-07-29	46	0	52	0	18	30	36	8	24	0	0	0	1	0	0	1	1	1	1	0	0	1	0	1	1	1	1	0	0	0	0	1	0	10	1
94	2	38	2015-07-29	34	1	52	1	13	25	12	8	12	1	1	0	0	0	0	0	0	0	0	1	1	0	0	0	0	0	0	0	0	0	0	0	0	2	0
99	2	28	2015-07-30	32	2	56	0	12	16	24	6	4	1	0	0	0	1	0	1	1	1	1	1	1	0	0	0	0	0	0	0	0	0	0	0	0	6	0
110	2	24	2015-08-02	52	20	71	0	4	20	120	8	12	1	0	0	0	2	1	1	1	1	1	1	1	1	1	1	1	1	1	1	1	0	0	1	0	15	1
159	2	21	2015-08-02	48	3	65	1	11	10	180	8	24	1	1	1	0	3	1	1	1	1	1	1	1	1	1	1	1	1	1	0	0	0	0	0	0	12	1
47	2	48	2015-08-03	38	2	55	1	28	20	18	8	24	1	1	1	1	3	1	1	1	1	1	1	1	1	1	1	1	0	0	0	0	0	0	1	1	12	1
69	2	53	2015-08-03	28	0	61	0	20	33	24	6	12	1	0	1	0	5	1	1	1	1	1	0	0	0	0	0	0	0	0	0	0	0	0	0	0	4	0
54	2	39	2015-08-03	40	3	66	1	24	15	12	10	12	1	1	1	0	4	1	0	0	0	0	0	0	0	0	0	0	0	0	0	0	0	0	0	0	0	0
56	2	51	2015-08-12	30	0	54	0	13	38	24	4	4	1	0	0	1	0	0	0	0	0	0	1	0	0	0	0	0	0	0	0	0	0	0	0	0	1	0
48	2	47	2015-08-17	37	5	57	1	17	30	66	7	24	1	1	1	1	2	1	0	0	0	0	0	0	0	0	0	0	0	0	0	0	0	0	0	0	0	0
100	2	32	2015-08-26	50	19	62	0	2	30	96	6	24	1	1	1	0	9	1	1	1	1	1	1	1	1	1	1	1	1	1	0	0	0	0	0	0	12	1
120	2	28	2015-08-26	37	8	58	0	20	8	36	5	48	1	1	1	1	1	0	0	0	0	0	0	0	0	0	0	0	0	0	0	0	0	0	0	0	0	0
86	2	19	2015-08-31	44	10	60	0	5	14	48	8	24	1	1	1	1	2	1	1	1	1	1	1	1	1	1	1	1	0	0	0	0	0	0	0	0	10	1
113	1	39	2015-09-07	44	3	68	0	8	31	12	6	24	1	1	1	1	1	0	1	1	1	1	1	1	0	0	0	0	0	0	0	0	0	0	0	0	6	0
161	2	22	2015-09-09	44	1	69	1	11	11	2.4	9	6	1	1	0	0	0	0	1	1	1	1	1	1	1	1	0	0	0	0	0	0	0	0	0	0	8	1
162	2	34	2015-09-10	43	13	56	0	4	30	12	8	72	1	1	1	0	4	1	1	1	1	1	1	1	1	1	1	1	1	1	0	0	0	0	0	0	12	1
106	2	38	2015-09-16	34	0	56	1	20	18	12	6	24	1	1	1	0	3	1	1	1	1	1	1	1	1	1	0	0	0	0	0	0	0	0	1	0	9	1
42	2	38	2015-09-18	28	4	58	0	19	19	54	8	6	1	1	1	1	3	1	1	1	0	0	1	1	0	0	0	0	0	0	0	0	0	0	0	0	4	0
163	2	40	2015-09-24	50	11	59	0	25	15	6	5	24	1	0	0	0	0	0	0	0	1	1	1	1	0	0	0	0	0	0	0	0	0	0	0	0	4	0
128	1	42	2015-09-24	37	3	53	1	7	35	6	8	24	1	0	0	0	2	1	0	0	1	1	1	1	0	0	0	0	0	0	0	0	0	0	0	0	4	0
35	2	61	2015-09-29	39	5	58	0	10	51	4.8	5	72	1	0	0	0	1	0	1	1	1	1	0	0	0	0	0	0	0	0	0	0	0	0	0	0	4	0
3	2	41	2015-09-29	35	6	62	0	0.08	40.92	84	7	12	1	0	1	0	3	1	1	1	0	0	0	0	0	0	0	0	0	0	0	0	0	0	0	0	2	0
164	2	32	2015-10-01	39	3	74	1	2	30	3.6	10	4	1	1	1	0	0	0	1	1	1	1	1	1	0	0	0	0	0	0	0	0	0	0	0	0	6	0
165	2	48	2015-10-06	37	3	56	1	18	30	120	6	4	0	1	1	0	2	1	0	0	0	0	0	0	0	0	0	0	0	0	0	0	0	0	0	0	0	0
166	2	20	2015-10-09	40	3	65	0	6	14	48	9	24	1	0	0	1	1	0	1	1	1	1	1	1	0	0	1	1	0	0	0	0	0	0	0	0	8	1
40	2	46	2015-10-11	59	0	60	0	21	25	96	8	24	1	1	1	0	0	0	1	1	1	1	1	1	0	0	1	1	0	0	0	0	0	0	1	1	10	1
53	2	20	2015-10-11	44	0	54	1	6	14	18	7	4	1	1	0	0	1	0	1	1	1	1	0	0	0	0	0	0	0	0	1	1	0	0	0	0	6	0
26	2	37	2015-10-12	53	8	73	0	24	13	48	8	24	1	1	1	1	8	1	1	1	1	1	1	1	1	1	1	1	1	1	1	1	0	0	0	0	14	1
36	1	21	2015-10-18	56	11	74	1	16	5	96	10	24	1	1	1	1	2	1	0	0	0	0	0	0	0	0	1	1	0	0	0	0	0	0	0	0	2	0
168	2	46	2015-10-23	47	5	65	0	34	12	12	10	6	1	1	1	1	4	1	1	1	0	0	0	0	0	0	0	0	0	0	0	0	0	0	0	0	2	0
19	2	28	2015-11-06	47	3.5	64	1	10	18	12	8	6	1	1	0	0	3	1	1	1	0	0	0	0	0	0	0	0	0	0	0	0	0	0	0	0	2	0
134	2	23	2015-11-09	50	13	63	0	3	20	18	6	192	1	1	1	1	5	1	1	1	1	1	1	1	0	0	0	0	0	0	1	1	0	0	0	0	8	1
77	2	36	2015-11-15	41	10	61	0	6	30	54	7	12	1	0	0	0	0	0	1	1	1	0	0	0	1	1	0	0	0	0	0	0	0	0	0	0	5	0
45	2	44	2015-11-24	54	2	63	1	35	9	12	2	6	1	1	1	1	5	1	1	1	1	1	1	1	1	1	1	1	1	1	1	1	0	0	1	1	16	1
170	2	32	2015-11-24	39	2	60	0	0.5	31.5	48	6	12	1	1	0	0	0	0	0	0	1	1	0	0	0	0	0	0	0	0	0	0	0	0	0	0	2	0
118	2	49	2015-11-26	44	23	74	0	39	10	48	10	48	1	1	1	1	4	1	0	0	1	1	0	0	0	0	0	0	1	1	0	0	0	0	0	0	4	0
171	2	33	2015-11-30	42	11	63	0	7	26	42	9	12	1	1	1	0	2	1	1	1	1	1	0	0	0	0	1	0	0	0	0	0	0	0	0	0	5	0
115	2	31	2015-12-02	53	4	56	0	16	15	24	8	24	1	1	0	1	3	1	1	1	1	1	1	1	1	1	1	1	0	0	0	0	0	0	0	0	10	1
9	2	45	2015-12-04	37	11	65	0	30	15	48	9	24	1	1	1	0	5	1	1	1	1	1	1	0	1	1	1	1	1	1	0	0	0	0	0	0	11	1
96	2	43	2015-12-11	44	0	58	0	5	38	18	5	12	1	1	0	1	1	0	1	1	1	1	0	0	1	0	0	0	0	0	0	0	0	0	0	0	5	0
132	2	52	2015-12-14	27	0	63	1	22	30	42	9	12	1	1	1	1	4	1	1	1	1	1	1	1	0	0	0	0	0	0	0	0	0	0	0	0	6	0
172	2	29	2015-12-16	45	2	58	1	19	10	24	5	12	1	1	0	1	3	1	0	0	0	0	0	0	0	0	0	0	0	0	0	0	0	0	0	0	0	0
169	2	52	2015-12-21	42	0	52	0	10	42	24	4	12	1	0	0	0	0	0	0	0	0	0	0	0	0	0	0	0	0	0	0	0	0	0	0	0	0	0
87	2	30	2015-12-25	52	15	70	0	8	22	3.6	10	24	1	1	1	1	5	1	1	1	1	1	1	1	1	1	0	0	0	0	0	0	0	0	0	0	8	1
7	2	27	2015-12-28	43	1	65	0	17	10	3.6	6	12	1	1	1	0	1	0	1	1	1	1	1	1	0	0	1	1	1	1	0	0	0	0	0	0	10	1
122	1	45	2015-12-28	30	6	65	0	7	38	48	7	24	1	1	0	0	1	0	1	1	0	0	0	1	0	0	0	0	0	0	0	0	0	0	0	0	3	0
29	2	58	2015-12-29	33	0	59	0	45	13	36	10	12	1	0	0	0	0	0	1	1	1	1	0	1	0	0	1	1	0	0	0	0	0	0	0	0	7	1
70	2	34	2016-01-09	34	1	61	0	16	18	30	10	6	1	0	1	0	2	1	1	1	1	1	0	0	0	0	1	1	0	0	0	0	0	0	0	0	6	0
174	2	50	2016-01-13	42	15	64	1	8	42	24	8	24	1	1	1	1	1	0	0	0	1	1	1	1	0	0	0	0	0	0	0	0	0	0	1	1	6	0
173	2	33	2016-01-18	40	1	61	0	17	16	18	8	12	1	0	0	1	4	1	1	1	1	1	0	0	1	1	1	1	0	0	0	0	0	0	0	0	8	1
138	1	48	2016-01-18	41	7	59	1	39	9	6	8	24	1	0	0	0	0	0	1	1	1	1	1	1	0	0	0	0	0	0	0	0	0	0	0	0	6	0
90	2	39	2016-01-25	51	0	66	1	21	18	120	8	60	1	1	1	1	9	1	1	1	1	1	1	1	1	0	0	0	0	0	0	0	0	0	0	0	7	1
39	2	30	2016-01-30	37	3	63	0	4	26	12	6	6	1	0	0	0	3	1	1	1	1	1	1	1	0	0	1	1	1	1	0	0	0	0	1	1	12	1
175	2	48	2016-02-04	25	11	60	0	28	20	12	8	24	1	1	0	0	4	1	1	1	0	0	1	1	0	0	1	1	0	0	0	0	0	0	0	0	6	0
55	2	41	2016-02-12	51	8	62	1	16	25	12	10	48	1	1	1	1	7	1	1	1	1	1	1	1	0	0	0	0	0	0	0	0	0	0	0	0	6	0
124	2	39	2016-02-18	30	4	63	0	11	28	12	10	12	1	1	1	0	6	1	1	1	1	1	1	1	1	1	1	1	1	1	1	1	1	1	0	0	16	1
41	2	38	2016-03-07	39	19	49	0	0.2	37.8	120	5	4	0	1	1	0	2	1	1	1	1	1	1	1	0	0	1	1	0	0	0	0	0	0	0	0	8	1
177	2	56	2016-03-07	26	3	55	0	38	18	1.5	7	8	1	1	1	1	3	1	0	0	0	0	0	0	0	0	0	0	0	0	0	0	0	0	0	0	0	0
66	2	55	2016-03-10	40	9	67	1	30	25	48	10	24	1	1	1	0	4	1	1	1	1	1	1	1	0	0	1	1	0	0	0	0	0	0	1	1	10	1
130	2	47	2016-03-16	42	0	52	0	25	22	30	8	12	1	1	1	1	2	1	1	1	0	0	1	1	0	0	1	1	0	0	0	0	0	0	0	0	6	0
95	2	46	2016-03-17	47	25	61	0	16	30	18	8	48	1	1	1	1	5	1	1	1	1	1	0	0	0	0	0	0	0	0	1	1	1	1	0	0	8	1
140	2	29	2016-03-17	48	1	60	1	20	9	36	6	12	1	1	1	0	5	1	1	1	1	1	1	1	1	1	1	1	1	1	0	0	0	0	0	0	12	1
61	2	39	2016-03-22	56	6	68	0	25	14	30	8	24	1	1	1	1	6	1	1	1	1	1	1	1	0	0	1	1	0	0	0	0	1	1	0	0	10	1
111	2	40	2016-03-22	42	7	66	1	10	30	12	7	12	1	1	1	0	4	1	1	1	1	1	1	1	1	1	1	1	0	0	0	0	0	0	0	0	10	1
46	2	52	2016-03-24	40	10	60	1	34	18	60	6	48	1	1	1	1	3	1	1	1	1	1	1	1	0	0	1	1	1	1	0	0	0	0	1	1	12	1
21	2	54	2016-03-31	55	6	64	1	30	24	12	8	6	1	0	0	0	1	0	1	1	1	1	1	1	1	1	1	1	1	1	0	0	0	0	1	1	14	1
176	2	37	2016-03-31	55	22	67	1	2	35	48	7	24	1	1	1	1	9	1	1	1	0	0	0	0	0	0	1	1	0	0	0	0	0	0	0	0	4	0
123	2	63	2016-04-14	38	18	66	1	15	48	30	10	6	1	1	1	1	3	1	1	1	1	1	1	1	1	1	1	1	0	0	0	0	0	0	0	0	10	1
50	2	34	2016-04-14	37	7	78	1	14	20	18	10	4	1	1	1	0	8	1	0	0	1	1	0	0	0	0	0	0	0	0	0	0	0	0	0	0	2	0
167	2	33	2016-04-14	35	16	58	0	20	13	30	9	24	1	1	1	1	5	1	0	0	0	0	0	0	0	0	0	0	0	0	0	0	0	0	0	0	0	0
4	2	45	2016-04-25	45	6	60	0	25	20	24	7	6	1	0	0	0	3	1	0	0	0	0	0	0	0	0	0	0	0	0	0	0	0	0	0	0	0	0
5	2	62	2016-04-25	45	0	65	1	51	11	48	4	48	1	0	1	1	5	1	0	0	0	0	1	1	0	0	1	1	0	0	0	0	0	0	0	0	4	0
30	2	23	2016-04-28	31	3	56	0	11	12	3.6	8	12	1	1	1	1	5	1	1	1	1	1	1	1	0	0	1	1	0	0	1	0	0	0	0	0	9	1
75	2	53	2016-04-28	42	11	66	0	41	12	48	5	48	1	1	1	1	1	0	1	0	0	0	0	0	0	0	0	0	0	0	0	0	0	0	0	0	1	0
179	1	48	2016-05-02	36	2	43	1	10	38	12	7	4	1	1	0	0	0	0	1	1	1	1	1	1	1	1	1	1	0	0	1	1	0	0	0	0	12	1
180	1	32	2016-05-02	42	6	58	1	7	25	24	10	6	1	1	1	0	1	0	1	1	1	1	1	1	0	0	0	0	0	0	0	0	0	0	0	0	6	0
85	1	42	2016-05-02	47	8	63	1	26	16	12	9	72	1	1	1	1	1	0	0	0	0	0	0	0	0	0	0	0	0	0	0	0	0	0	0	0	0	0
93	2	34	2016-05-20	54	8	68	1	15	19	48	8	24	1	1	0	0	1	0	1	1	1	1	1	1	1	1	1	1	0	0	0	0	0	0	0	0	10	1
182	1	21	2016-05-26	40	1	55	1	7	14	3.48	8	24	1	1	1	0	0	0	0	0	0	0	0	0	0	0	0	0	0	0	0	0	0	0	0	0	0	0
52	2	56	2016-05-27	47	0	59	0	37	19	48	7	48	1	0	0	0	0	0	1	1	1	1	1	1	1	1	1	1	0	0	1	1	0	0	0	0	12	1
107	2	54	2016-05-27	30	0	54	0	20	34	6	6	24	1	0	0	0	0	0	0	0	1	1	0	0	0	0	1	1	0	0	0	0	0	0	0	0	4	0
117	2	29	2016-05-30	47	10	64	0	23	6	24	7	12	1	1	1	1	0	0	1	1	1	1	1	1	1	1	0	0	0	0	0	0	0	0	0	0	8	1
183	1	30	2016-05-30	31	4	66	0	10	20	36	7	6	1	1	0	0	2	1	1	1	1	1	1	1	0	0	1	1	0	0	0	0	0	0	0	0	8	1
81	2	34	2016-06-01	31	3	60	0	10	24	12	6	12	1	1	1	0	1	0	0	0	1	1	0	0	0	0	0	0	0	0	0	0	0	0	0	0	2	0
184	2	34	2016-06-14	47	0.5	67	0	4	30	12	10	4	1	0	0	0	0	0	1	1	0	0	0	0	0	0	1	1	0	0	0	0	0	0	0	0	4	0
71	2	45	2016-06-15	43	0	54	0	20	25	24	5	1	1	0	0	0	1	0	1	1	1	1	1	1	1	1	1	1	1	1	0	0	0	0	0	0	12	1
57	2	35	2016-06-16	61	0	67	0	17	18	120	7	24	1	1	1	1	2	1	1	1	1	1	1	1	1	1	1	1	1	1	0	0	0	0	0	0	12	1
97	2	46	2016-06-16	51	20	62	1	36	10	144	10	24	1	1	1	1	5	1	1	1	1	1	1	1	1	1	1	1	1	1	0	0	0	0	0	0	12	1
181	2	50	2016-06-20	35	3	54	1	30	20	48	7	4	0	1	0	0	6	1	0	0	1	1	0	0	0	0	0	0	0	0	0	0	0	0	0	0	2	0
92	1	48	2016-06-20	41	2	53	1	28	20	3.96	10	24	1	1	0	0	3	1	0	0	1	0	0	0	0	0	0	0	0	0	0	0	0	0	0	0	1	0
178	2	50	2016-06-21	28	4	61	0	15	35	12	8	6	1	1	0	0	5	1	1	1	1	1	0	0	0	0	1	1	0	0	0	0	0	0	0	0	6	0
14	2	46	2016-06-21	38	4	59	1	31	15	6	10	12	1	1	0	0	3	1	0	0	1	1	0	0	1	0	0	0	0	0	0	0	0	0	0	0	3	0
185	2	31	2016-06-22	52	3	64	1	15	16	30	10	6	1	1	1	0	2	1	0	0	1	1	1	1	1	1	1	1	1	1	0	0	0	0	1	1	12	1
160	2	28	2016-06-22	45	1	47	0	18	10	36	5	4	1	1	0	0	3	1	1	1	0	1	0	1	1	0	1	0	1	0	1	0	0	0	0	1	9	1
133	2	38	2016-06-27	26	1	62	0	18	20	24	6	48	1	1	1	1	4	1	1	1	1	1	1	1	1	1	1	1	0	0	0	0	0	0	0	0	10	1
186	1	35	2016-06-27	31	0	54	0	23	12	24	8	6	1	1	1	1	1	0	0	0	0	0	0	0	0	0	0	0	0	0	0	0	0	0	0	0	0	0
127	2	45	2016-06-30	47	4	60	1	26	19	18	7	6	1	1	1	0	8	1	1	1	1	1	1	1	0	0	0	0	1	1	1	1	1	1	0	0	12	1
28	2	41	2016-07-04	47	25	74	1	27	14	18	9	72	1	1	1	1	8	1	1	1	1	1	1	1	1	1	1	1	1	1	0	0	0	0	0	0	12	1
24	1	33	2016-07-11	43	7	57	1	15	18	1.2	8	6	1	1	1	0	7	1	1	1	1	1	1	1	0	0	1	1	0	0	0	0	0	0	0	0	8	1
112	1	43	2016-07-11	43	1	52	1	23	20	6	7	4	1	0	0	0	2	1	1	1	0	0	0	0	0	0	1	1	1	1	0	0	0	0	0	0	6	0
136	2	29	2016-07-13	51	17	51	1	11	18	48	10	24	1	0	0	0	0	0	0	0	0	0	1	1	0	0	0	0	0	0	0	0	0	0	0	0	2	0
187	1	41	2016-07-25	46	0	62	0	15	26	42	8	24	1	1	1	1	0	0	1	1	1	1	1	1	0	0	1	1	0	0	0	0	0	0	0	0	8	1
188	1	36	2016-08-05	47	2	61	0	17	19	3.4992	8	24	1	1	0	0	3	1	1	1	0	0	1	1	0	0	0	0	0	0	0	0	0	0	0	0	4	0
72	2	51	2016-08-07	29	1	51	0	37	14	12	8	24	1	1	0	0	3	1	1	1	1	1	0	1	0	0	1	1	0	0	0	0	0	0	0	0	7	1
25	2	52	2016-08-12	45	0	63	1	36	16	24	7	12	1	1	1	1	5	1	1	1	1	1	1	1	1	1	1	1	1	1	0	0	0	0	1	1	14	1
189	2	30	2016-08-17	42	0	57	0	10	20	48	7	6	1	1	1	1	3	1	1	1	1	1	0	0	1	1	1	1	0	0	0	0	0	0	1	1	10	1
59	2	31	2016-08-29	36	1	62	1	16	15	24	9	4	1	1	1	1	9	1	1	1	1	1	1	1	1	1	1	0	0	0	1	1	0	0	1	0	12	1
																		115	128	126	128	128	90	94	52	46	76	72	29	28	20	17	16	15	21	14
																		0.653409		0.721591		0.727273		0.522727		0.278409		0.420455		0.161932		0.105114		0.0880682		0.0994318
second ID	gender	current age	Date	SDS	MIDAS	HIT-6	Aura	duration of disease	age at onset	freaquency/year	intensity of headache	duration of attack	Nausea	photophobia	phonophobia	osmophobia	ASC12	allodynia present	Rt. Second Rib oisitive TP	Lt. Second Rib oisitive TP	Rt. Low Cervical positeve TP	Lt. Low Cervical positeve TP	Rt. Lateral Epicondyle positeve TP	Lt. Lateral Epicondyle positeve TP	LT. Occiput positeve TP	RT. Occiput positeve TP	Lt. Trapezius positeve TP	Rt. Trapezius positeve TP	Lt. Supraspinatus positeve TP	Rt. Supraspinatus positeve TP	Lt. Gluteal positive TP	Rt. Gluteal positive TP	Lt. Greater Trochanter positive TP	Rt. Greater Trochanter positive TP	Rt. Knee positive TP	Lt. Knee positive TP	TPC	WPH pisitive

## Sheet: 対照132例TP数
second ID	gender	current age	Date	Rt. Second Rib oisitive TP	Lt. Second Rib oisitive TP	Low Cervical	RT. Low Cervical positeve TP	LT. Low Cervical positeve TP	Lateral Epicondyle	Lt. Occiput positeve TP	Rt. Occiput positeve TP	Lt. Trapezius positeve TP	Rt. Trapezius positeve TP	Lt. Supraspinatus positeve TP	Rt. Supraspinatus positeve TP	Lt. Gluteal positive TP	Rt. Gluteal positive TP	Lt. Greater Trochanter positive TP	Rt. Greater Trochanter positive TP	Rt. Knee positive TP	Lt. Knee positive TP	TPC
C100	2	25	2015-12-24	1	1	1	1	1	1	1	1	1	1	0	0	0	0	0	0	0	0	10
C120	2	35	2016-07-28	1	1	1	1	1	1	0	0	1	1	0	0	0	0	1	1	0	0	10
C137	2	53	2016-08-24	0	0	1	1	1	1	1	1	1	1	1	1	0	0	0	0	0	0	10
C51	2	44	2015-11-23	1	1	1	1	0	0	1	1	1	1	0	0	0	0	0	0	0	0	8
C103	2	19	2016-01-30	1	1	0	0	1	1	1	1	1	1	0	0	0	0	0	0	0	0	8
C42	2	22	2015-11-16	1	0	1	0	1	1	0	0	1	1	0	0	1	0	0	0	0	0	7
C14	2	53	2015-05-30	1	1	1	1	0	0	1	1	0	0	0	0	0	0	0	0	0	0	6
C68	2	29	2015-07-28	1	1	1	1	0	0	0	0	1	1	0	0	0	0	0	0	0	0	6
C111	2	24	2015-11-22	1	1	0	0	0	1	1	0	1	1	0	0	0	0	0	0	0	0	6
C113	2	30	2016-07-10	0	0	1	1	0	0	1	1	1	1	0	0	0	0	0	0	0	0	6
C116	1	39	2016-07-20	1	1	1	1	1	1	0	0	0	0	0	0	0	0	0	0	0	0	6
C140	2	41	2016-08-28	1	1	1	1	0	0	0	0	0	0	0	0	0	0	1	1	0	0	6
C141	2	48	2016-09-02	1	1	1	1	0	0	1	1	0	0	0	0	0	0	0	0	0	0	6
C77	2	18	2015-10-05	1	1	0	1	0	0	0	0	1	1	0	0	0	0	0	0	0	0	5
C98	2	22	2015-12-14	1	1	0	0	0	1	0	0	1	1	0	0	0	0	0	0	0	0	5
C10	2	28	2015-05-16	1	1	0	0	0	0	0	0	1	1	0	0	0	0	0	0	0	0	4
C12	2	27	2015-05-23	1	1	0	0	0	0	0	0	1	1	0	0	0	0	0	0	0	0	4
C13	2	49	2015-05-25	1	1	1	1	0	0	0	0	0	0	0	0	0	0	0	0	0	0	4
C15	2	45	2015-05-30	1	1	1	1	0	0	0	0	0	0	0	0	0	0	0	0	0	0	4
C20	2	26	2015-06-10	1	1	1	1	0	0	0	0	0	0	0	0	0	0	0	0	0	0	4
C71	2	44	2015-08-21	0	1	1	1	0	1	0	0	0	0	0	0	0	0	0	0	0	0	4
C32	2	58	2015-11-01	1	1	0	0	0	0	0	0	1	1	0	0	0	0	0	0	0	0	4
C36	1	44	2015-11-06	0	0	0	0	0	0	1	1	1	1	0	0	0	0	0	0	0	0	4
C43	2	34	2015-11-16	0	0	0	0	0	0	1	1	1	1	0	0	0	0	0	0	0	0	4
C90	2	35	2015-11-25	1	1	1	1	0	0	0	0	0	0	0	0	0	0	0	0	0	0	4
C99	2	27	2015-12-17	0	1	1	0	0	1	0	0	1	0	0	0	0	0	0	0	0	0	4
C119	2	18.9	2016-07-25	0	0	0	0	0	0	1	1	1	1	0	0	0	0	0	0	0	0	4
C131	2	43	2016-08-20	0	0	1	1	1	1	0	0	0	0	0	0	0	0	0	0	0	0	4
C138	2	58	2016-08-26	1	1	0	0	1	1	0	0	0	0	0	0	0	0	0	0	0	0	4
C79	2	63	2015-10-07	1	1	0	1	0	0	0	0	0	0	0	0	0	0	0	0	0	0	3
C85	2	47	2015-10-28	1	1	0	1	0	0	0	0	0	0	0	0	0	0	0	0	0	0	3
C101	2	43	2015-12-29	0	0	0	1	0	0	0	0	1	1	0	0	0	0	0	0	0	0	3
C11	2	65	2015-05-22	1	1	0	0	0	0	0	0	0	0	0	0	0	0	0	0	0	0	2
C16	2	33	2015-06-01	0	0	0	0	0	0	0	0	1	1	0	0	0	0	0	0	0	0	2
C72	2	53	2015-08-31	1	1	0	0	0	0	0	0	0	0	0	0	0	0	0	0	0	0	2
C38	2	29	2015-11-13	1	1	0	0	0	0	0	0	0	0	0	0	0	0	0	0	0	0	2
C44	2	40	2015-11-16	1	1	0	0	0	0	0	0	0	0	0	0	0	0	0	0	0	0	2
C45	2	58	2015-11-16	0	0	1	1	0	0	0	0	0	0	0	0	0	0	0	0	0	0	2
C49	2	50	2015-11-20	1	1	0	0	0	0	0	0	0	0	0	0	0	0	0	0	0	0	2
C92	2	50	2015-11-26	0	0	0	0	1	1	0	0	0	0	0	0	0	0	0	0	0	0	2
C54	2	24	2015-12-01	0	0	0	0	0	0	0	0	1	1	0	0	0	0	0	0	0	0	2
C96	2	31	2015-12-04	0	0	1	1	0	0	0	0	0	0	0	0	0	0	0	0	0	0	2
C102	2	19	2015-12-29	0	0	0	0	0	0	1	1	0	0	0	0	0	0	0	0	0	0	2
C104	2	20	2016-03-15	1	1	0	0	0	0	0	0	0	0	0	0	0	0	0	0	0	0	2
C106	2	22	2016-03-24	1	1	0	0	0	0	0	0	0	0	0	0	0	0	0	0	0	0	2
C114	2	50	2016-07-14	0	0	1	1	0	0	0	0	0	0	0	0	0	0	0	0	0	0	2
C118	2	38	2016-07-24	1	1	0	0	0	0	0	0	0	0	0	0	0	0	0	0	0	0	2
C123	2	24	2016-08-03	1	1	0	0	0	0	0	0	0	0	0	0	0	0	0	0	0	0	2
C128	2	30	2016-08-06	0	0	1	1	0	0	0	0	0	0	0	0	0	0	0	0	0	0	2
C127	2	28	2016-08-06	0	0	0	0	1	1	0	0	0	0	0	0	0	0	0	0	0	0	2
C132	2	35	2016-08-20	0	0	0	0	1	1	0	0	0	0	0	0	0	0	0	0	0	0	2
C135	2	31	2016-08-22	0	0	1	1	0	0	0	0	0	0	0	0	0	0	0	0	0	0	2
C64	2	59	2015-07-08	0	0	0	0	0	0	0	0	0	0	0	0	0	0	0	0	1	0	1
C86	1	32	2015-11-02	0	0	0	0	0	1	0	0	0	0	0	0	0	0	0	0	0	0	1
C46	2	31	2015-11-16	0	0	1	0	0	0	0	0	0	0	0	0	0	0	0	0	0	0	1
C89	2	46	2015-11-20	0	0	1	0	0	0	0	0	0	0	0	0	0	0	0	0	0	0	1
C1	2	40	2015-03-09	0	0	0	0	0	0	0	0	0	0	0	0	0	0	0	0	0	0	0
C25	2	34	2015-03-24	0	0	0	0	0	0	0	0	0	0	0	0	0	0	0	0	0	0	0
C2	2	46	2015-04-05	0	0	0	0	0	0	0	0	0	0	0	0	0	0	0	0	0	0	0
C3	2	61	2015-05-02	0	0	0	0	0	0	0	0	0	0	0	0	0	0	0	0	0	0	0
C4	2	38	2015-05-03	0	0	0	0	0	0	0	0	0	0	0	0	0	0	0	0	0	0	0
C5	2	65	2015-05-03	0	0	0	0	0	0	0	0	0	0	0	0	0	0	0	0	0	0	0
C6	2	23	2015-05-05	0	0	0	0	0	0	0	0	0	0	0	0	0	0	0	0	0	0	0
C7	2	55	2015-05-08	0	0	0	0	0	0	0	0	0	0	0	0	0	0	0	0	0	0	0
C60	2	59	2015-05-08	0	0	0	0	0	0	0	0	0	0	0	0	0	0	0	0	0	0	0
C8	2	49	2015-05-10	0	0	0	0	0	0	0	0	0	0	0	0	0	0	0	0	0	0	0
C9	2	43	2015-05-13	0	0	0	0	0	0	0	0	0	0	0	0	0	0	0	0	0	0	0
C61	2	70	2015-05-15	0	0	0	0	0	0	0	0	0	0	0	0	0	0	0	0	0	0	0
C62	2	52	2015-05-19	0	0	0	0	0	0	0	0	0	0	0	0	0	0	0	0	0	0	0
C17	1	47	2015-06-01	0	0	0	0	0	0	0	0	0	0	0	0	0	0	0	0	0	0	0
C18	1	31	2015-06-02	0	0	0	0	0	0	0	0	0	0	0	0	0	0	0	0	0	0	0
C19	2	67	2015-06-08	0	0	0	0	0	0	0	0	0	0	0	0	0	0	0	0	0	0	0
C63	2	34	2015-06-19	0	0	0	0	0	0	0	0	0	0	0	0	0	0	0	0	0	0	0
C23	2	43	2015-06-21	0	0	0	0	0	0	0	0	0	0	0	0	0	0	0	0	0	0	0
C26	2	31	2015-07-07	0	0	0	0	0	0	0	0	0	0	0	0	0	0	0	0	0	0	0
C65	1	52	2015-07-11	0	0	0	0	0	0	0	0	0	0	0	0	0	0	0	0	0	0	0
C66	1	46	2015-07-16	0	0	0	0	0	0	0	0	0	0	0	0	0	0	0	0	0	0	0
C67	2	39	2015-07-23	0	0	0	0	0	0	0	0	0	0	0	0	0	0	0	0	0	0	0
C69	2	58	2015-08-10	0	0	0	0	0	0	0	0	0	0	0	0	0	0	0	0	0	0	0
C70	2	36	2015-08-20	0	0	0	0	0	0	0	0	0	0	0	0	0	0	0	0	0	0	0
C73	1	67	2015-08-31	0	0	0	0	0	0	0	0	0	0	0	0	0	0	0	0	0	0	0
C74	2	66	2015-08-31	0	0	0	0	0	0	0	0	0	0	0	0	0	0	0	0	0	0	0
C75	1	45	2015-09-05	0	0	0	0	0	0	0	0	0	0	0	0	0	0	0	0	0	0	0
C76	2	18	2015-10-03	0	0	0	0	0	0	0	0	0	0	0	0	0	0	0	0	0	0	0
C78	2	59	2015-10-05	0	0	0	0	0	0	0	0	0	0	0	0	0	0	0	0	0	0	0
C80	2	57	2015-10-10	0	0	0	0	0	0	0	0	0	0	0	0	0	0	0	0	0	0	0
C31	2	29	2015-10-16	0	0	0	0	0	0	0	0	0	0	0	0	0	0	0	0	0	0	0
C82	2	51	2015-10-19	0	0	0	0	0	0	0	0	0	0	0	0	0	0	0	0	0	0	0
C81	2	28	2015-10-19	0	0	0	0	0	0	0	0	0	0	0	0	0	0	0	0	0	0	0
C83	1	34	2015-10-20	0	0	0	0	0	0	0	0	0	0	0	0	0	0	0	0	0	0	0
C84	2	65	2015-10-20	0	0	0	0	0	0	0	0	0	0	0	0	0	0	0	0	0	0	0
C33	1	35	2015-11-02	0	0	0	0	0	0	0	0	0	0	0	0	0	0	0	0	0	0	0
C34	1	37	2015-11-03	0	0	0	0	0	0	0	0	0	0	0	0	0	0	0	0	0	0	0
C35	2	57	2015-11-05	0	0	0	0	0	0	0	0	0	0	0	0	0	0	0	0	0	0	0
C87	2	53	2015-11-10	0	0	0	0	0	0	0	0	0	0	0	0	0	0	0	0	0	0	0
C37	2	24	2015-11-12	0	0	0	0	0	0	0	0	0	0	0	0	0	0	0	0	0	0	0
C39	1	40	2015-11-13	0	0	0	0	0	0	0	0	0	0	0	0	0	0	0	0	0	0	0
C41	2	47	2015-11-13	0	0	0	0	0	0	0	0	0	0	0	0	0	0	0	0	0	0	0
C40	2	34	2015-11-13	0	0	0	0	0	0	0	0	0	0	0	0	0	0	0	0	0	0	0
C88	2	37	2015-11-13	0	0	0	0	0	0	0	0	0	0	0	0	0	0	0	0	0	0	0
C47	1	31	2015-11-16	0	0	0	0	0	0	0	0	0	0	0	0	0	0	0	0	0	0	0
C48	2	38	2015-11-16	0	0	0	0	0	0	0	0	0	0	0	0	0	0	0	0	0	0	0
C50	1	36	2015-11-20	0	0	0	0	0	0	0	0	0	0	0	0	0	0	0	0	0	0	0
C91	2	42	2015-11-25	0	0	0	0	0	0	0	0	0	0	0	0	0	0	0	0	0	0	0
C93	2	40	2015-11-27	0	0	0	0	0	0	0	0	0	0	0	0	0	0	0	0	0	0	0
C52	2	56	2015-11-28	0	0	0	0	0	0	0	0	0	0	0	0	0	0	0	0	0	0	0
C53	2	60	2015-11-29	0	0	0	0	0	0	0	0	0	0	0	0	0	0	0	0	0	0	0
C21	2	60	2015-12-01	0	0	0	0	0	0	0	0	0	0	0	0	0	0	0	0	0	0	0
C94	2	24	2015-12-03	0	0	0	0	0	0	0	0	0	0	0	0	0	0	0	0	0	0	0
C56	2	38	2015-12-04	0	0	0	0	0	0	0	0	0	0	0	0	0	0	0	0	0	0	0
C55	2	37	2015-12-04	0	0	0	0	0	0	0	0	0	0	0	0	0	0	0	0	0	0	0
C97	2	29	2015-12-04	0	0	0	0	0	0	0	0	0	0	0	0	0	0	0	0	0	0	0
C27	2	25	2015-12-06	0	0	0	0	0	0	0	0	0	0	0	0	0	0	0	0	0	0	0
C28	2	39	2015-12-06	0	0	0	0	0	0	0	0	0	0	0	0	0	0	0	0	0	0	0
C29	2	59	2015-12-07	0	0	0	0	0	0	0	0	0	0	0	0	0	0	0	0	0	0	0
C22	2	27	2015-12-10	0	0	0	0	0	0	0	0	0	0	0	0	0	0	0	0	0	0	0
C58	2	43	2015-12-11	0	0	0	0	0	0	0	0	0	0	0	0	0	0	0	0	0	0	0
C59	1	46	2015-12-12	0	0	0	0	0	0	0	0	0	0	0	0	0	0	0	0	0	0	0
C105	2	24	2016-03-17	0	0	0	0	0	0	0	0	0	0	0	0	0	0	0	0	0	0	0
C108	1	38	2016-07-14	0	0	0	0	0	0	0	0	0	0	0	0	0	0	0	0	0	0	0
C117	2	35	2016-07-20	0	0	0	0	0	0	0	0	0	0	0	0	0	0	0	0	0	0	0
C109	1	35	2016-07-23	0	0	0	0	0	0	0	0	0	0	0	0	0	0	0	0	0	0	0
C121	2	19.7	2016-07-30	0	0	0	0	0	0	0	0	0	0	0	0	0	0	0	0	0	0	0
C122	2	38	2016-07-31	0	0	0	0	0	0	0	0	0	0	0	0	0	0	0	0	0	0	0
C110	1	34	2016-08-04	0	0	0	0	0	0	0	0	0	0	0	0	0	0	0	0	0	0	0
C126	2	39	2016-08-04	0	0	0	0	0	0	0	0	0	0	0	0	0	0	0	0	0	0	0
C129	2	46	2016-08-06	0	0	0	0	0	0	0	0	0	0	0	0	0	0	0	0	0	0	0
C130	2	38	2016-08-12	0	0	0	0	0	0	0	0	0	0	0	0	0	0	0	0	0	0	0
C133	1	35	2016-08-20	0	0	0	0	0	0	0	0	0	0	0	0	0	0	0	0	0	0	0
C134	2	30	2016-08-20	0	0	0	0	0	0	0	0	0	0	0	0	0	0	0	0	0	0	0
C136	2	47	2016-08-22	0	0	0	0	0	0	0	0	0	0	0	0	0	0	0	0	0	0	0
C139	1	34	2016-08-27	0	0	0	0	0	0	0	0	0	0	0	0	0	0	0	0	0	0	0
				32	33	25	25	11	16	12	11	21	20	1	1	1	0	2	2	1	0
					0.246212		0.189394		0.102273		0.0871212		0.155303		0.00757576		0.00378788		0.0151515		0.00378788

## Sheet: 男女TP有意差MW
TPC	ENorControl
17	1
12	1
2	1
4	1
4	1
9	1
0	1
0	1
2	1
6	1
4	1
9	1
0	1
12	1							最小	0.25	メディアン	0.75	最大	P
0	1						MorC=1 0 2 6 10.00 17 1.21e-22	0	2	6	10	17	P<0.00
2	1						MorC=2 0 0 0 2.25 10	0	0	0	2.25	10
12	1
4	1
0	1		最小 25% メディアン 75% 最大 P値
6	1		MorC=1 0 2 6 10.00 17 1.21e-22
6	1		MorC=2 0 0 0 2.25 10
2	1
8	1
2	1
13	1
6	1
6	1
10	1
4	1
6	1
6	1
6	1
2	1
8	1
4	1
0	1
6	1
4	1
2	1
4	1
10	1
4	1
2	1
3	1
1	1
6	1
0	1
6	1
4	1
0	1
0	1
11	1
12	1
10	1
1	1
8	1
7	1
4	1
8	1
10	1
4	1
1	1
16	1
8	1
6	1
6	1
10	1
8	1
4	1
10	1
2	1
6	1
15	1
12	1
12	1
4	1
0	1
1	1
0	1
12	1
0	1
10	1
6	1
8	1
12	1
9	1
4	1
4	1
4	1
4	1
2	1
6	1
0	1
8	1
10	1
6	1
14	1
2	1
2	1
2	1
8	1
5	1
16	1
2	1
4	1
5	1
10	1
11	1
5	1
6	1
0	1
0	1
8	1
10	1
3	1
7	1
6	1
6	1
8	1
6	1
7	1
12	1
6	1
6	1
16	1
8	1
0	1
10	1
6	1
8	1
12	1
10	1
10	1
12	1
14	1
4	1
10	1
2	1
0	1
0	1
4	1
9	1
1	1
12	1
6	1
0	1
10	1
0	1
12	1
4	1
8	1
8	1
2	1
4	1
12	1
12	1
12	1
2	1
1	1
6	1
3	1
12	1
9	1
10	1
0	1
12	1
12	1
8	1
6	1
2	1
8	1
4	1
7	1
14	1
10	1
12	1
6	2
6	2
4	2
1	2
0	2
0	2
0	2
0	2
0	2
0	2
0	2
0	2
0	2
0	2
0	2
0	2
0	2
0	2
0	2
0	2
0	2
10	2
10	2
10	2
8	2
8	2
7	2
6	2
6	2
6	2
6	2
6	2
6	2
5	2
5	2
4	2
4	2
4	2
4	2
4	2
4	2
4	2
4	2
4	2
4	2
4	2
4	2
4	2
3	2
3	2
3	2
2	2
2	2
2	2
2	2
2	2
2	2
2	2
2	2
2	2
2	2
2	2
2	2
2	2
2	2
2	2
2	2
2	2
2	2
2	2
2	2
1	2
1	2
1	2
0	2
0	2
0	2
0	2
0	2
0	2
0	2
0	2
0	2
0	2
0	2
0	2
0	2
0	2
0	2
0	2
0	2
0	2
0	2
0	2
0	2
0	2
0	2
0	2
0	2
0	2
0	2
0	2
0	2
0	2
0	2
0	2
0	2
0	2
0	2
0	2
0	2
0	2
0	2
0	2
0	2
0	2
0	2
0	2
0	2
0	2
0	2
0	2
0	2
0	2
0	2
0	2
0	2
0	2
0	2
0	2
0	2
0	2

## Sheet: 男女別TPM176
仮ID	gender	TPC			male TPC	female TPC
78	1	4			4	17
139	1	9			9	12
141	1	0			0	2
98	1	6			6	4
44	1	2			2	9
152	1	4			4	0
153	1	6			6	0
126	1	10			10	2
154	1	3			3	6
155	1	0			0	4
74	1	4			4	0
121	1	0			0	12
113	1	6			6	2
128	1	4			4	12
36	1	2			2	4
122	1	3			3	0
138	1	6			6	6
179	1	12			12	8
180	1	6			6	2
85	1	0			0	13
182	1	0			0	6
183	1	8			8	6
92	1	1			1	10
186	1	0			0	4
24	1	8			8	6
112	1	6			6	6
187	1	8			8	6
188	1	4			4	2
22	2	17				8
131	2	12				0
143	2	2				4
65	2	4				2
144	2	9				4
102	2	0				4
108	2	0				2
116	2	2				1
88	2	6				6
6	2	4				6
33	2	0				0
103	2	12				11
142	2	2				12
91	2	12				10
145	2	4				1
146	2	0				8
73	2	6				7
147	2	8				4
38	2	2				8
18	2	13				10
63	2	6				4
60	2	6				1
148	2	10				16
149	2	4				8
190	2	6				6
129	2	6				6
27	2	6				10
150	2	2				8
151	2	8				4
82	2	0				10
17	2	4				2
8	2	2				6
51	2	4				15
109	2	4				12
62	2	2				12
80	2	1				4
64	2	6				0
76	2	6				1
49	2	0				0
125	2	11				12
104	2	12				0
32	2	10				10
2	2	1				8
105	2	8				12
58	2	7				9
20	2	4				4
83	2	8				4
68	2	10				4
84	2	4				2
157	2	1				6
34	2	16				0
119	2	8				8
11	2	6				10
158	2	6				6
101	2	10				14
114	2	8				2
12	2	4				2
156	2	10				8
94	2	2				5
99	2	6				16
110	2	15				2
159	2	12				4
47	2	12				5
69	2	4				10
54	2	0				11
56	2	1				5
48	2	0				6
100	2	12				0
120	2	0				0
86	2	10				8
161	2	8				10
162	2	12				7
106	2	9				6
42	2	4				6
163	2	4				8
35	2	4				7
3	2	2				12
164	2	6				6
165	2	0				6
166	2	8				16
40	2	10				8
53	2	6				0
26	2	14				10
168	2	2				6
19	2	2				8
134	2	8				12
77	2	5				10
45	2	16				10
170	2	2				12
118	2	4				14
171	2	5				4
115	2	10				10
9	2	11				2
96	2	5				0
132	2	6				0
172	2	0				4
169	2	0				9
87	2	8				1
7	2	10				10
29	2	7				12
70	2	6				4
174	2	6				8
173	2	8				2
90	2	7				4
39	2	12				12
175	2	6				12
55	2	6				12
124	2	16				2
41	2	8				6
177	2	0				3
66	2	10				12
130	2	6				9
95	2	8				10
140	2	12				12
61	2	10				12
111	2	10				2
46	2	12				7
21	2	14				14
176	2	4				10
123	2	10				12
50	2	2		平均	4	6.7686
167	2	0		SD	#DIV/0!	4.31617
4	2	0
5	2	4
30	2	9
75	2	1
93	2	10
52	2	12
107	2	4
117	2	8
81	2	2
184	2	4
71	2	12
57	2	12
97	2	12
181	2	2
178	2	6
14	2	3
185	2	12
160	2	9
133	2	10
127	2	12
28	2	12
136	2	2
72	2	7
25	2	14
189	2	10
59	2	12
	保護(これから上にのみ記入）
	平均	6.25
	SD	4.28352
